# Supplementary material for: Alternative meiotic chromatid segregation in the holocentric plant Luzula elegans
Source: PubMed Central journal article supplement (PMC4214429; doi:10.1038/ncomms5979), 2014-10-08
Supplement: ncomms5979-s1.pdf [file ncomms5979-s1.pdf]

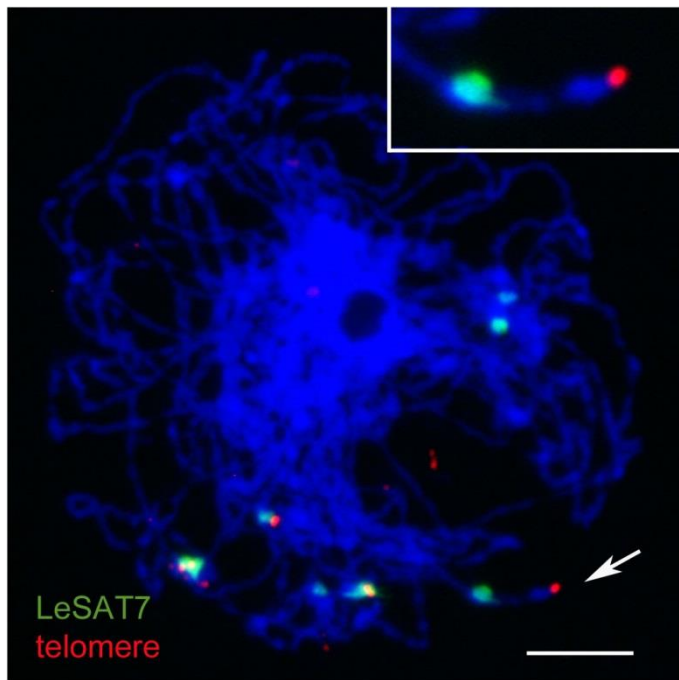

Supplementary Figure 1

***Arabidopsis*-type telomeres are localized at chromosome termini in close proximity to satellite DNA LeSAT7.** Extended pachytene chromosomes labelled with LeSAT7- (green) and telomere-specific (red) FISH probes. Inset and arrow show an enlarged chromosome end. DNA counterstained with DAPI (blue). Bar = 10  $\mu$ m.

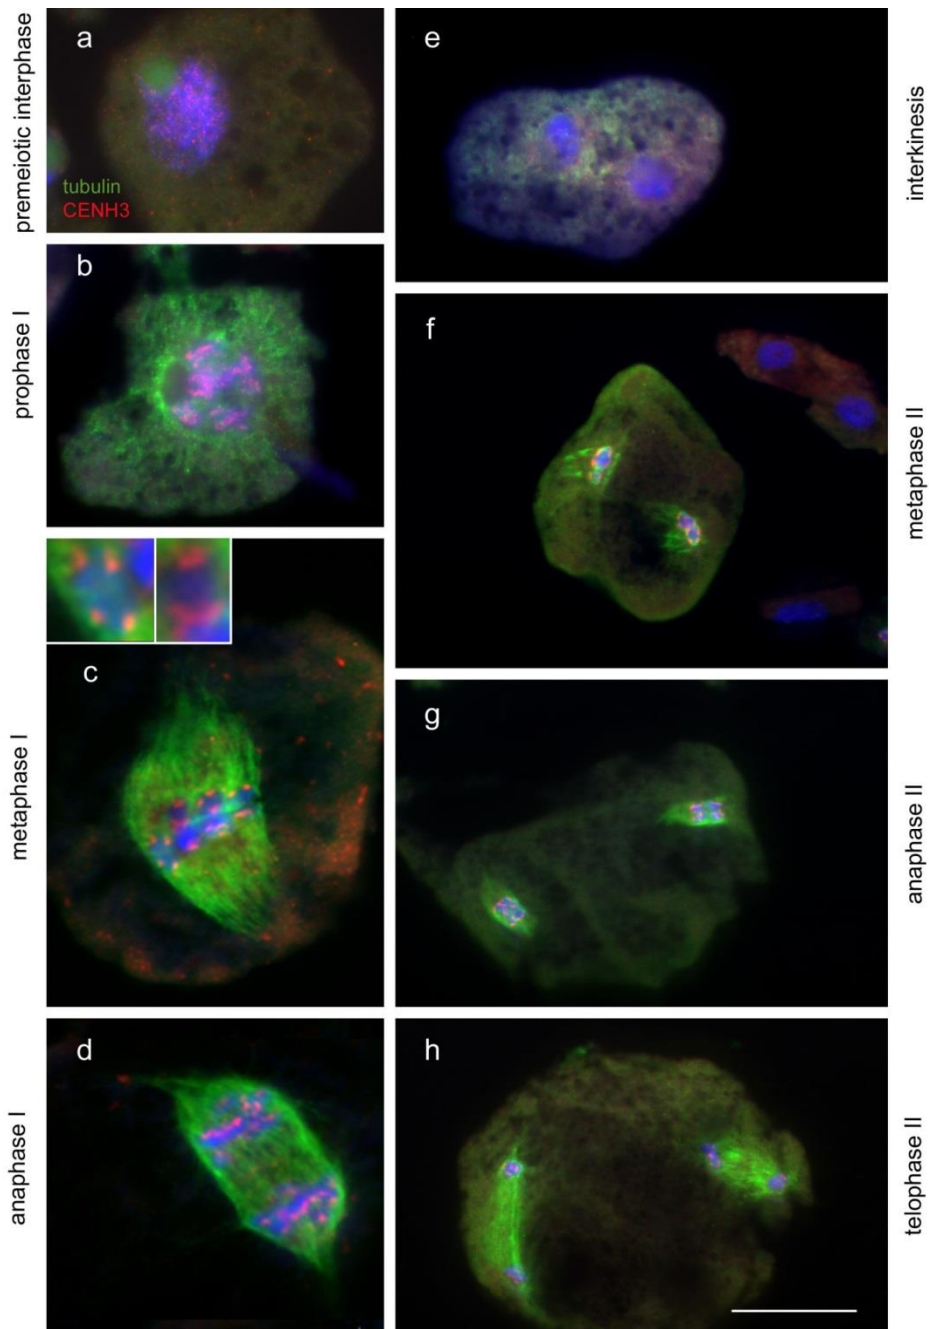

Supplementary Figure 2

**Meiosis in *L. luzuloides*.** A holocentric chromosome structure and an inverted order of chromatid segregation events were observed by immunostaining with anti-CENH3 (red) and anti- $\alpha$ -tubulin (green) antibodies. Insets in (c) show an enlarged cruciform bivalent and an enlarged rod bivalent with end-to-end associated homologous chromosomes. Nuclei were counterstained with DAPI (blue). Bar = 10  $\mu$ m.

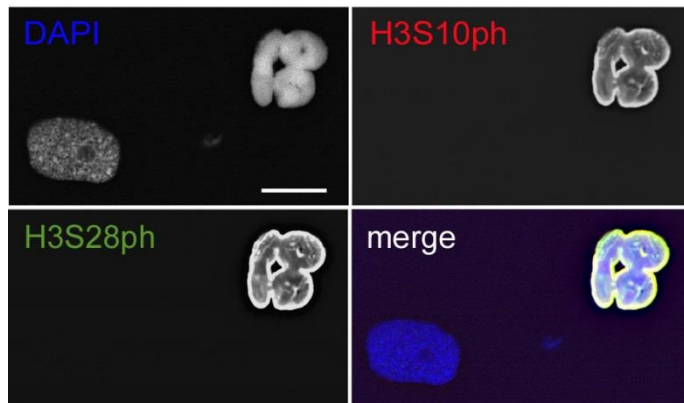

Supplementary Figure 3

***L. elegans* bivalents exhibit a uniform distribution of the cell cycle-dependent phosphorylation of histone H3 at serine 10 (H3S10ph; red) and serine 28 (H3S28ph; green) at metaphase I. The entire chromosomes are H3 hyperphosphorylated. Nuclei were counterstained with DAPI (blue). Bar = 10  $\mu$ m.**

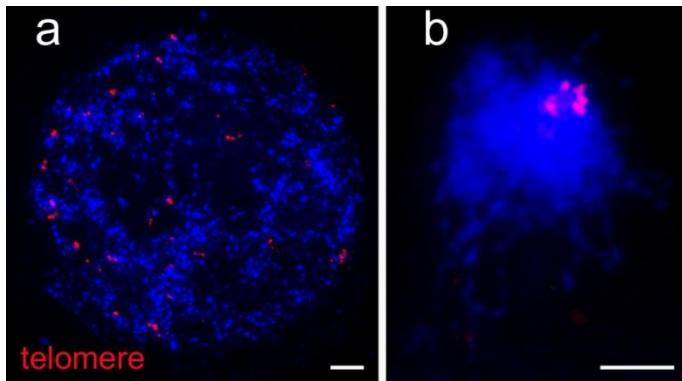

Supplementary Figure 4

**Holocentric chromosomes of *L. luzuloides* behave in a similar way to monocentric chromosomes during prophase I.** Telomeres were used as FISH probes. *Arabidopsis*-type telomere signals (red) are randomly distributed in the premeiotic nucleus (a). A bouquet-like configuration is present during zygotene; all telomere signals are clustered (b). Nuclei were counterstained with DAPI (blue). Bars = 10  $\mu\text{m}$ .

Supplementary Table 1.

**Chromosome-specific frequency of bivalent configurations during meiosis I in  
*L. elegans*.**

|                                      | <b>ring bivalent</b> | <b>rod bivalent</b> | <b>cruciform bivalent</b> |
|--------------------------------------|----------------------|---------------------|---------------------------|
| Chromosome 1<br>number analysed = 40 | 47.5%                | 40.0%               | 12.5%                     |
| Chromosome 2<br>number analysed = 46 | 43.5%                | 45.6%               | 10.9%                     |
| Chromosome 3<br>number analysed = 43 | 48.8%                | 44.2%               | 7.0%                      |

Supplementary Table 2.

**Frequency of end-to-end connections of homologous non-sister chromatids at anaphase I and at the onset of anaphase II.** Representative chromatids are shown in inserts after FISH with LeSAT7- (green) and telomere-(red) specific probes. The DNA is DAPI-stained (blue).

| <b>anaphase I</b>                                                                 |                                                                                   | <b>onset of anaphase II</b>                                                       |                                                                                     |
|-----------------------------------------------------------------------------------|-----------------------------------------------------------------------------------|-----------------------------------------------------------------------------------|-------------------------------------------------------------------------------------|
| one connection                                                                    | two connections                                                                   | one connection                                                                    | separated                                                                           |
| 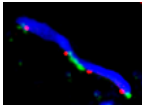 |  |  |  |
| 55%                                                                               | 45%                                                                               | 57%                                                                               | 43%                                                                                 |
| total number 200                                                                  |                                                                                   | total number 93                                                                   |                                                                                     |
